# Supplementary material for: Blood-feeding patterns of native mosquitoes and insights into their potential role as pathogen vectors in the Thames estuary region of the United Kingdom
Source: PubMed Central journal article supplement (PMC5369192; doi:10.1186/s13071-017-2098-4), 2017-03-27
Supplement: 13071_2017_2098_MOESM1_ESM.pdf [file 13071_2017_2098_MOESM1_ESM.pdf]

**Additional file 1: Table S1.** Details of all primer sets used in this study

| Purpose                                                                                              | Primer name | Primer sequence (5' – 3')                       | Reference(s) |
|------------------------------------------------------------------------------------------------------|-------------|-------------------------------------------------|--------------|
| Identification of vertebrate blood meal                                                              | VF1_t1      | TGTAAAACGACGGCCAGTTCTCAACCAACC<br>ACAAAGACATTGG | 42           |
|                                                                                                      | VF1d_t1     | TGTAAAACGACGGCCAGTTCTCAACCAACC<br>ACAARGAYATYGG |              |
|                                                                                                      | VF1i_t1     | TGTAAAACGACGGCCAGTTCTCAACCAACC<br>AIAAIGAIATIGG |              |
|                                                                                                      | VR1d_t1     | CAGGAAACAGCTATGACTAGACTTCTGGGT<br>GGCCRAARAAYCA |              |
|                                                                                                      | VR1_t1      | CAGGAAACAGCTATGACTAGACTTCTGGGT<br>GGCCAAAGAATCA |              |
|                                                                                                      | VR1i_t1     | CAGGAAACAGCTATGACTAGACTTCTGGGT<br>GICCIAAIAAICA |              |
| Separation of <i>Culex pipiens</i> s.l. and <i>Culex torrentium</i>                                  | ACEtorr     | TGCCTGTGCTACCAGTGATGTT                          | 44           |
|                                                                                                      | ACEpip      | GGAAACAACGACGTATGTAG                            |              |
| Separation of <i>Culex pipiens</i> form <i>pipiens</i> and <i>Culex pipiens</i> form <i>molestus</i> | CQ11F       | GATCCTAGCAAGCGAGAAC                             | 45, 46       |
|                                                                                                      | molCQ11     | CCCTCCAGTAAGGTATCAAC                            |              |
|                                                                                                      | pipCQ11 R   | CATGTTGAGCTTCGGTGAA                             |              |
| Species delineation of <i>Anopheles maculipennis</i> s.l.                                            | 5.8S        | TGTGAACTGCAGGACACAT                             | 47           |
|                                                                                                      | 28S         | ATGCTTAAATTTAGGGGGTA                            |              |
