# Supplementary material for: Blood-feeding patterns of native mosquitoes and insights into their potential role as pathogen vectors in the Thames estuary region of the United Kingdom
Source: PubMed Central journal article supplement (PMC5369192; doi:10.1186/s13071-017-2098-4), 2017-03-27
Supplement: 13071_2017_2098_MOESM2_ESM.pdf [file 13071_2017_2098_MOESM2_ESM.pdf]

**Additional file 2: Table S2.** Full breakdown of mosquito field collection results over the 36 collection visits by trap type and location.

| Mosquito species                     | Resting boxes |                  | Toilets    |                   | Barn         |                    | Chicken coops |                  | Roof structure |                | Red feeder |                 | MMP        |                | Totals       |                    |
|--------------------------------------|---------------|------------------|------------|-------------------|--------------|--------------------|---------------|------------------|----------------|----------------|------------|-----------------|------------|----------------|--------------|--------------------|
|                                      | total         | BF (%)           | total      | BF (%)            | Total        | BF (%)             | total         | BF (%)           | total          | BF (%)         | total      | BF (%)          | total      | BF (%)         | total        | BF (%)             |
| <i>Anopheles claviger</i>            | 0             | -                | 0          | -                 | 1            | 1 (100)            | 0             | -                | 0              | -              | 0          | -               | 2          | 0 (0)          | 3            | 1 (33.3)           |
| <i>Anopheles maculipennis s.l.</i>   | 1809          | 95 (5.3)         | 776        | 166 (21.4)        | 12832        | 1329 (10.4)        | 131           | 73 (55.7)        | 21             | 1 (4.8)        | 59         | 7 (11.9)        | 25         | 0 (0)          | 15653        | 1671 (10.7)        |
| <i>Coquillettidia richiardii</i>     | 106           | 9 (8.5)          | 2          | 0 (0)             | 1            | 0 (0)              | 0             | -                | 0              | -              | 0          | -               | 193        | 1 (0.5)        | 302          | 10 (3.3)           |
| <i>Culex modestus</i>                | 14            | 2 (14.3)         | 6          | 3 (50)            | 1            | 0 (0)              | 0             | -                | 0              | -              | 0          | -               | 324        | 0 (0)          | 345          | 5 (1.4)            |
| <i>Culex pipiens s.l./torrentium</i> | 1038          | 85 (8.2)         | 72         | 13 (18.1)         | 567          | 11 (1.9)           | 0             | -                | 35             | 1 (2.9)        | 1          | 0 (0)           | 13         | 0 (0)          | 1726         | 110 (6.4)          |
| <i>Culex spp.</i>                    | 1             | 0 (0)            | 0          | -                 | 0            | -                  | 0             | -                | 0              | -              | 0          | -               | 0          | -              | 1            | 0 (0)              |
| <i>Culiseta annulata</i>             | 2104          | 279 (13.3)       | 33         | 7 (21.2)          | 267          | 57 (21.3)          | 0             | -                | 2              | 2 (100)        | 1          | 0 (0)           | 40         | 1 (2.5)        | 2447         | 346 (14.1)         |
| <i>Culiseta morsitans</i>            | 3             | 3 (100)          | 0          | -                 | 0            | -                  | 0             | -                | 0              | -              | 0          | -               | 0          | -              | 3            | 3 (0)              |
| <i>Culiseta spp.</i>                 | 25            | 7 (28.0)         | 0          | -                 | 0            | -                  | 0             | -                | 0              | -              | 0          | -               | 0          | -              | 25           | 7 (28.0)           |
| <i>Ochlerotatus caspius/dorsalis</i> | 2             | 0 (0)            | 1          | 0 (0)             | 0            | -                  | 0             | -                | 0              | -              | 0          | -               | 7          | 0 (0)          | 10           | 0 (0)              |
| <i>Ochlerotatus detritus</i>         | 5             | 5 (100)          | 0          | -                 | 1            | 1 (100)            | 0             | -                | 1              | 0 (0)          | 0          | -               | 11         | 0 (0)          | 18           | 6 (33.3)           |
| <i>Ochlerotatus flavescens</i>       | 0             | -                | 0          | -                 | 0            | -                  | 0             | -                | 0              | -              | 0          | -               | 130        | 0 (0)          | 130          | 0 (0)              |
| <i>Damaged</i>                       | -             | -                | -          | -                 | -            | -                  | -             | -                | -              | -              | -          | -               | -          | -              | 3            | 0 (0)              |
| <b>Totals</b>                        | <b>5107</b>   | <b>485 (9.5)</b> | <b>890</b> | <b>189 (21.2)</b> | <b>13670</b> | <b>1399 (10.2)</b> | <b>131</b>    | <b>73 (55.7)</b> | <b>59</b>      | <b>4 (6.8)</b> | <b>61</b>  | <b>7 (11.5)</b> | <b>745</b> | <b>2 (0.3)</b> | <b>20666</b> | <b>2159 (10.4)</b> |
