# Supplementary material for: Blood-feeding patterns of native mosquitoes and insights into their potential role as pathogen vectors in the Thames estuary region of the United Kingdom
Source: PubMed Central journal article supplement (PMC5369192; doi:10.1186/s13071-017-2098-4), 2017-03-27
Supplement: 13071_2017_2098_MOESM3_ESM.pdf [file 13071_2017_2098_MOESM3_ESM.pdf]

**Additional file 3: Table S3.** (a) Regression coefficients, plus Wald 95% confidence intervals, standard errors and z values, for the negative binomial GLMM for all mosquitoes (all species, all physiological states). Predicted % difference is the (exponent  $\times$  100) of the value in the estimate column and gives the estimated change in blood-fed numbers collected depending on the box location compared to resting box location A as a baseline, or for a one-unit increase in meteorological variables.  $***P \leq 0.001$ ,  $**P \leq 0.01$ ,  $*P \leq 0.05$ . (b) Multiple Tukey's comparisons between the numbers of mosquitoes (all species, all physiological states) collected in each resting box location for all species. Predicted % difference is the (exponent  $\times$  100) of the value in the estimate column and gives the estimated change of the catch between two resting boxes.  $***P \leq 0.001$ . (c) Regression coefficients, plus Wald 95% confidence intervals, standard errors and z values, for the final negative binomial GLMM, for all blood-fed mosquito species. Predicted % difference is the (exponent  $\times$  100) of the value in the estimate column and gives the estimated change in blood-fed numbers collected depending on the box location compared to resting box location A as a baseline, or for a one-unit increase in meteorological variables.  $***P \leq 0.001$ ,  $**P \leq 0.01$ . (d) Description: Multiple Tukey's comparisons between the numbers of blood-feds collected in each resting box location for all species. Predicted % difference is the (exponent  $\times$  100) of the value in the estimate column and gives the estimated change of the catch between two resting boxes.  $***P \leq 0.001$ .

(a)

| Coefficients      | Estimate (95% CI)         | Predicted % difference | Std. Error | Z value |
|-------------------|---------------------------|------------------------|------------|---------|
| (Intercept)       | -4.929 (-9.98; 0.03)      | -                      | 2.5290     | -1.95   |
| location B        | -2.572 (-2.81; -2.33) *** | 7.64                   | 0.1230     | -20.91  |
| location C        | -1.074 (-1.27; -0.88) *** | 34.16                  | 0.1008     | -10.65  |
| location D        | -2.819 (-3.07; -2.56) *** | 5.97                   | 0.1305     | -21.61  |
| rainfall          | -0.699 (-1.34; -0.06) *   | 49.71                  | 0.3266     | -2.14   |
| wind speed        | -0.767 (-1.13; -0.40) *** | 46.44                  | 0.1858     | -4.13   |
| temperature       | 0.200 (0.09; 0.31) ***    | 122.14                 | 0.0537     | 3.73    |
| relative humidity | 0.061 (0.01; 0.11) *      | 106.29                 | 0.0262     | 2.32    |

(b)

| <b>Linear hypotheses:</b>     |                 |                               |                   |                |
|-------------------------------|-----------------|-------------------------------|-------------------|----------------|
| <b>Resting box comparison</b> | <b>Estimate</b> | <b>Predicted % difference</b> | <b>Std. Error</b> | <b>Z value</b> |
| B - A == 0                    | -2.572 ***      | -7.64                         | 0.1230            | -20.909        |
| C - A == 0                    | -1.074 ***      | -34.16                        | 0.1008            | -10.653        |
| D - A == 0                    | -2.819 ***      | -5.97                         | 0.1305            | -21.606        |
| C - B == 0                    | 1.498 ***       | 447.27                        | 0.1532            | 9.779          |
| D - B == 0                    | -0.247          | -78.66                        | 0.1922            | -1.286         |
| D - C == 0                    | -1.745 ***      | -17.46                        | 0.1868            | -9.344         |

(c)

| <b>Coefficients</b> | <b>Estimate (95% CI)</b>  | <b>Predicted % difference</b> | <b>Std. Error</b> | <b>Z value</b> |
|---------------------|---------------------------|-------------------------------|-------------------|----------------|
| (Intercept)         | -3.149 (-8.31; 2.01)      | -                             | 2.63170           | -1.20          |
| location B          | -2.849 (-3.39; -2.31) *** | -5.79                         | 0.27429           | -10.39         |
| location C          | -1.431 (-1.75; -1.11) *** | -23.92                        | 0.16409           | -8.72          |
| location D          | -3.415 (-4.11; -2.73) *** | -3.29                         | 0.35207           | -9.70          |
| rainfall            | -0.379 (-1.07; 0.31)      | -68.48                        | 0.35050           | -1.08          |
| wind speed          | -0.679 (-1.10; -0.25) **  | -50.73                        | 0.21707           | -3.13          |
| temperature         | 0.243 (0.13; 0.36) ***    | 127.47                        | 0.05945           | 4.08           |
| relative humidity   | 0.006 (-0.05; 0.06)       | 100.61                        | 0.02752           | 0.22           |

(d)

| <b>Linear hypotheses:</b>     |                 |                               |                   |                |
|-------------------------------|-----------------|-------------------------------|-------------------|----------------|
| <b>Resting box comparison</b> | <b>Estimate</b> | <b>Predicted % difference</b> | <b>Std. Error</b> | <b>Z value</b> |
| B - A == 0                    | -2.849 ***      | -5.79                         | 0.2743            | -10.386        |
| C - A == 0                    | -1.431 ***      | -23.92                        | 0.1641            | -8.719         |
| D - A == 0                    | -3.415 ***      | -3.29                         | 0.3521            | -9.700         |
| C - B == 0                    | 1.418 ***       | 412.93                        | 0.2869            | 4.943          |
| D - B == 0                    | -0.566          | -56.76                        | 0.5174            | -1.095         |
| D - C == 0                    | -1.985 ***      | -13.74                        | 0.4799            | -4.135         |
