# Supplementary material for: Blood-feeding patterns of native mosquitoes and insights into their potential role as pathogen vectors in the Thames estuary region of the United Kingdom
Source: PubMed Central journal article supplement (PMC5369192; doi:10.1186/s13071-017-2098-4), 2017-03-27
Supplement: 13071_2017_2098_MOESM4_ESM.pdf [file 13071_2017_2098_MOESM4_ESM.pdf]

**Additional file 4: Table S4.** Mosquito species organised according to Sella stage of digestion. Mosquitoes comprise all specimens collected in the study (all trap locations and by all collection methods combined across 36 visits to Elmley in 2014).

| Mosquito species                     | Males (%)          | Sella stage of blood meal digestion |                  |                  |                  |                  |                  |                   | Totals        |
|--------------------------------------|--------------------|-------------------------------------|------------------|------------------|------------------|------------------|------------------|-------------------|---------------|
|                                      |                    | I (%)                               | II (%)           | III (%)          | IV (%)           | V (%)            | VI (%)           | VII (%)           |               |
| <i>Anopheles claviger</i>            | 0 (0)              | 2 (66.7)                            | 1 (33.3)         | 0 (0)            | 0 (0)            | 0 (0)            | 0 (0)            | 0 (0)             | <b>3</b>      |
| <i>Anopheles maculipennis s.l.</i>   | 6294 (40.2)        | 6655 (42.5)                         | 171 (1.1)        | 420 (2.7)        | 408 (2.6)        | 340 (2.2)        | 332 (2.1)        | 1033 (6.6)        | <b>15 653</b> |
| <i>Coquillettidia richiardii</i>     | 45 (14.9)          | 216 (71.5)                          | 1 (0.3)          | 0 (0)            | 3 (1.0)          | 3 (1.0)          | 3 (1.0)          | 31 (10.3)         | <b>302</b>    |
| <i>Culex modestus</i>                | 1 (0.3)            | 336 (97.4)                          | 1 (0.3)          | 1 (0.3)          | 2 (0.6)          | 1 (0.3)          | 0 (0)            | 3 (0.9)           | <b>345</b>    |
| <i>Culex pipiens s.l./torrentium</i> | 673 (39.0)         | 524 (30.4)                          | 42 (2.4)         | 40 (2.3)         | 15 (0.9)         | 3 (0.2)          | 10 (0.6)         | 419 (24.3)        | <b>1726</b>   |
| <i>Culex spp.</i>                    | 0 (0)              | 1 (100)                             | 0 (0)            | 0 (0)            | 0 (0)            | 0 (0)            | 0 (0)            | 0 (0)             | <b>1</b>      |
| <i>Culiseta annulata</i>             | 1267 (51.8)        | 601 (24.6)                          | 32 (1.3)         | 113 (4.6)        | 80 (3.3)         | 68 (2.8)         | 53 (2.2)         | 233 (9.5)         | <b>2447</b>   |
| <i>Culiseta morsitans</i>            | 0 (0)              | 0 (0)                               | 2 (66.7)         | 1 (33.3)         | 0 (0)            | 0 (0)            | 0 (0)            | 0 (0)             | <b>3</b>      |
| <i>Culiseta spp.</i>                 | 4 (16.0)           | 5 (20.0)                            | 0 (0)            | 3 (12.0)         | 2 (8.0)          | 0 (0)            | 2 (8.0)          | 9 (36.0)          | <b>25</b>     |
| <i>Ochlerotatus caspius/dorsalis</i> | 1 (10.0)           | 9 (90.0)                            | 0 (0)            | 0 (0)            | 0 (0)            | 0 (0)            | 0 (0)            | 0 (0)             | <b>10</b>     |
| <i>Ochlerotatus detritus</i>         | 0 (0)              | 11 (61.1)                           | 1 (5.6)          | 3 (16.7)         | 2 (11.1)         | 0 (0)            | 0 (0)            | 1 (5.6)           | <b>18</b>     |
| <i>Ochlerotatus flavescens</i>       | 0 (0)              | 130 (100)                           | 0 (0)            | 0 (0)            | 0 (0)            | 0 (0)            | 0 (0)            | 0 (0)             | <b>130</b>    |
| <i>Damaged (not identifiable)</i>    | 0 (0)              | 3 (100)                             | 0 (0)            | 0 (0)            | 0 (0)            | 0 (0)            | 0 (0)            | 0 (0)             | <b>3</b>      |
| <b>Totals</b>                        | <b>8285 (40.1)</b> | <b>8493 (41.1)</b>                  | <b>251 (1.2)</b> | <b>581 (2.8)</b> | <b>512 (2.5)</b> | <b>415 (2.0)</b> | <b>400 (1.9)</b> | <b>1729 (8.4)</b> | <b>20 666</b> |
