# Supplementary material for: Blood-feeding patterns of native mosquitoes and insights into their potential role as pathogen vectors in the Thames estuary region of the United Kingdom
Source: PubMed Central journal article supplement (PMC5369192; doi:10.1186/s13071-017-2098-4), 2017-03-27
Supplement: 13071_2017_2098_MOESM5_ESM.pdf [file 13071_2017_2098_MOESM5_ESM.pdf]

**Additional file 5: Table S5.** Success rates for blood meal identification for blood-fed specimens of three mosquito species at increasing stages of digestion (Sella stages II – VI) at the PCR and sequencing steps of the analysis workflow. ‘All species’ refers to the three species included in the table plus the remaining species included in the overall blood meal analysis.

| Processing stages              | All species<br><i>all stages</i> | <i>An. maculipennis</i> s.l. |             |             |             |             | <i>Culiseta annulata</i> |             |             |             |             | <i>Culex pipiens</i> s.l. |             |             |             |             |
|--------------------------------|----------------------------------|------------------------------|-------------|-------------|-------------|-------------|--------------------------|-------------|-------------|-------------|-------------|---------------------------|-------------|-------------|-------------|-------------|
|                                |                                  | <i>II</i>                    | <i>III</i>  | <i>IV</i>   | <i>V</i>    | <i>VI</i>   | <i>II</i>                | <i>III</i>  | <i>IV</i>   | <i>V</i>    | <i>VI</i>   | <i>II</i>                 | <i>III</i>  | <i>IV</i>   | <i>V</i>    | <i>VI</i>   |
| Total mosquitoes tested        | 1341                             | 170                          | 415         | 111         | 81          | 81          | 31                       | 112         | 81          | 66          | 56          | 42                        | 35          | 16          | 2           | 9           |
| PCR positive                   | 1034                             | 153                          | 348         | 92          | 56          | 62          | 25                       | 68          | 51          | 37          | 24          | 41                        | 33          | 15          | 2           | 6           |
| <b>PCR success rate</b>        | <b>0.77</b>                      | <b>0.90</b>                  | <b>0.84</b> | <b>0.83</b> | <b>0.69</b> | <b>0.77</b> | <b>0.81</b>              | <b>0.61</b> | <b>0.63</b> | <b>0.56</b> | <b>0.43</b> | <b>0.98</b>               | <b>0.94</b> | <b>0.94</b> | <b>1.00</b> | <b>0.67</b> |
| Successful blood meal ID       | 964                              | 152                          | 337         | 88          | 47          | 30          | 22                       | 67          | 51          | 35          | 21          | 40                        | 33          | 15          | 10          | 4           |
| <b>Sequencing success rate</b> | <b>0.93</b>                      | <b>0.99</b>                  | <b>0.97</b> | <b>0.96</b> | <b>0.84</b> | <b>0.48</b> | <b>0.88</b>              | <b>0.99</b> | <b>1.00</b> | <b>0.95</b> | <b>0.88</b> | <b>0.98</b>               | <b>1.00</b> | <b>1.00</b> | <b>1.00</b> | <b>0.67</b> |
| <b>Final success rate</b>      | <b>0.72</b>                      | <b>0.89</b>                  | <b>0.81</b> | <b>0.80</b> | <b>0.58</b> | <b>0.37</b> | <b>0.71</b>              | <b>0.60</b> | <b>0.63</b> | <b>0.53</b> | <b>0.38</b> | <b>0.96</b>               | <b>0.94</b> | <b>0.94</b> | <b>1.00</b> | <b>0.45</b> |
| <b>%</b>                       | <b>72</b>                        | <b>89</b>                    | <b>81</b>   | <b>80</b>   | <b>58</b>   | <b>37</b>   | <b>71</b>                | <b>60</b>   | <b>63</b>   | <b>53</b>   | <b>38</b>   | <b>96</b>                 | <b>94</b>   | <b>94</b>   | <b>100</b>  | <b>45</b>   |
